# Supplementary material for: Investigating the mechanism of phosphorene nanoribbon synthesis by discharging black phosphorus intercalation compounds
Source: Royal Society of Chemistry journal article supplement (doi:10.1039/d3nr05416k), 2023-12-27
Supplement: d3nr05416k1.pdf [file d3nr05416k1.pdf]

## Supplementary Information: Investigating the Mechanism of Phosphorene Nanoribbon Synthesis by Discharging Black Phosphorus Intercalation Compounds

Rebecca Shutt<sup>1</sup>, Eva Aw<sup>1</sup>, Qili Liu<sup>2</sup>, Jasper Berry-Gair<sup>2</sup>, Hector J. Lancaster<sup>1</sup>, Samia Said<sup>3</sup>, Thomas S. Miller<sup>3</sup>, Furio Cora<sup>2</sup>, Christopher A. Howard<sup>1\*</sup>, Adam J. Clancy<sup>2\*</sup>.

(1) Department of Physics and Astronomy, University College London, London, WC1E 6BT (UK),

(2) Department of Chemistry, University College London, London, WC1E 0AJ (UK),

(3) Electrochemical Innovation Laboratory, Department of Chemical Engineering, University College London, Gower Street, London, WC1E 6BT (UK).

Email: [a.clancy@ucl.ac.uk](mailto:a.clancy@ucl.ac.uk), [c.howard@ucl.ac.uk](mailto:c.howard@ucl.ac.uk)

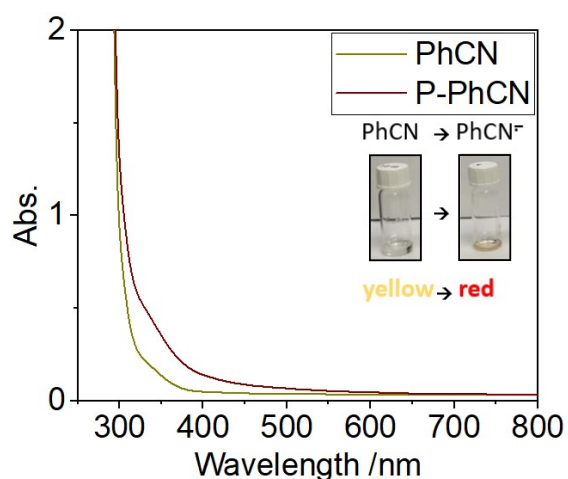

**Supplementary figure S1.** UV-vis spectra of PhCN before and after addition to  $\text{Li}_{(1/8)}\text{P}$ , with photos of PhCN in cuvette before and after addition to  $\text{Li}_{(1/8)}\text{P}$  inset.

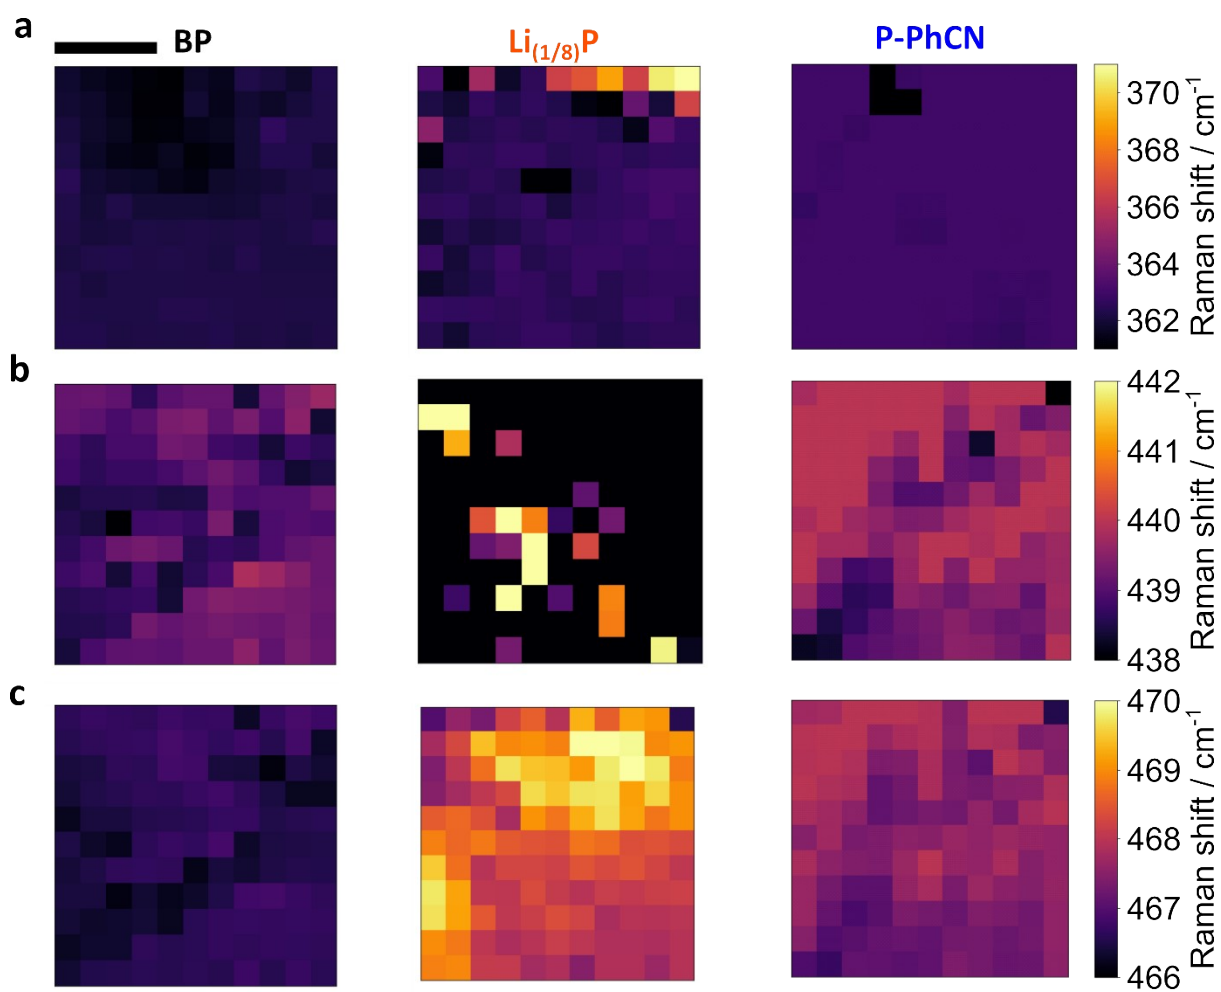

**Supplementary figure S2.** Supplementary Raman map analysis. Fitted centres of Raman peaks arising from (a)  $A_g^1$ , (b)  $B_{2g}$ , (c)  $A_g^2$  modes in BP,  $Li_{(1/8)}P$ , and P-PhCN samples. Lateral scale bar = 20  $\mu m$ .

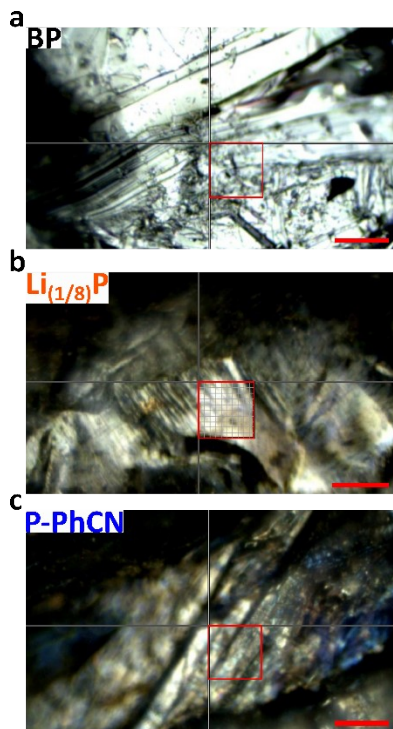

**Supplementary figure S3. Optical micrographs of the (a) BP, (b)  $\text{Li}_{(1/8)}\text{P}$ , and (c) P-PhCN samples captured through a through a  $\times 20$  objective lens. The crosshairs (white) and  $50 \mu\text{m} \times 50 \mu\text{m}$  area used for Raman spectroscopic map analysis (red box) are shown. Scalebar =  $50 \mu\text{m}$ .**

**Supplementary table S1.** The mean intensities, peak centres, and FWHM extracted from the Raman spectroscopy map analysis. The corresponding first standard deviations from the mean are also given.

**BP**

| <b>Peak</b> | <b>Parameter</b> | <b>mean (<math>\mu</math>)</b> | <b>standard deviation (<math>\sigma</math>)</b> |
|-------------|------------------|--------------------------------|-------------------------------------------------|
| $A_g^1$     | centre           | 362.0                          | 0.3                                             |
|             | FWHM             | 3.1                            | 0.2                                             |
|             | intensity        | 1730                           | 420                                             |
| $B_{2g}$    | centre           | 439.0                          | 0.3                                             |
|             | FWHM             | 3.7                            | 0.5                                             |
|             | intensity        | 1520                           | 380                                             |
| $A_g^2$     | centre           | 466.5                          | 0.2                                             |
|             | FWHM             | 3.0                            | 0.1                                             |
|             | intensity        | 2630                           | 940                                             |

**Li<sub>(1/8)</sub>P**

| <b>Peak</b> | <b>Parameter</b> | <b>mean (<math>\mu</math>)</b> | <b>standard deviation (<math>\sigma</math>)</b> |
|-------------|------------------|--------------------------------|-------------------------------------------------|
| $A_g^1$     | centre           | 362.9                          | 1.3                                             |
|             | FWHM             | 10.1                           | 10.1                                            |
|             | intensity        | 300                            | 230                                             |
| $B_{2g}$    | centre           | 440.8                          | 0.4                                             |
|             | FWHM             | 9.0                            | 4.4                                             |
|             | intensity        | 490                            | 240                                             |
| $A_g^2$     | centre           | 468.5                          | 0.7                                             |
|             | FWHM             | 7.8                            | 2.2                                             |
|             | intensity        | 1020                           | 490                                             |

**P-PhCN**

| <b>Peak</b> | <b>Parameter</b> | <b>mean (<math>\mu</math>)</b> | <b>standard deviation (<math>\sigma</math>)</b> |
|-------------|------------------|--------------------------------|-------------------------------------------------|
| $A_g^1$     | centre           | 363.0                          | 0.1                                             |
|             | FWHM             | 5.6                            | 1.1                                             |
|             | intensity        | 1390                           | 490                                             |
| $B_{2g}$    | centre           | 439.6                          | 0.5                                             |
|             | FWHM             | 6.7                            | 1.6                                             |
|             | intensity        | 2050                           | 500                                             |
| $A_g^2$     | centre           | 467.5                          | 0.3                                             |
|             | FWHM             | 5.3                            | 0.8                                             |
|             | intensity        | 4470                           | 1180                                            |

## XPS further analysis

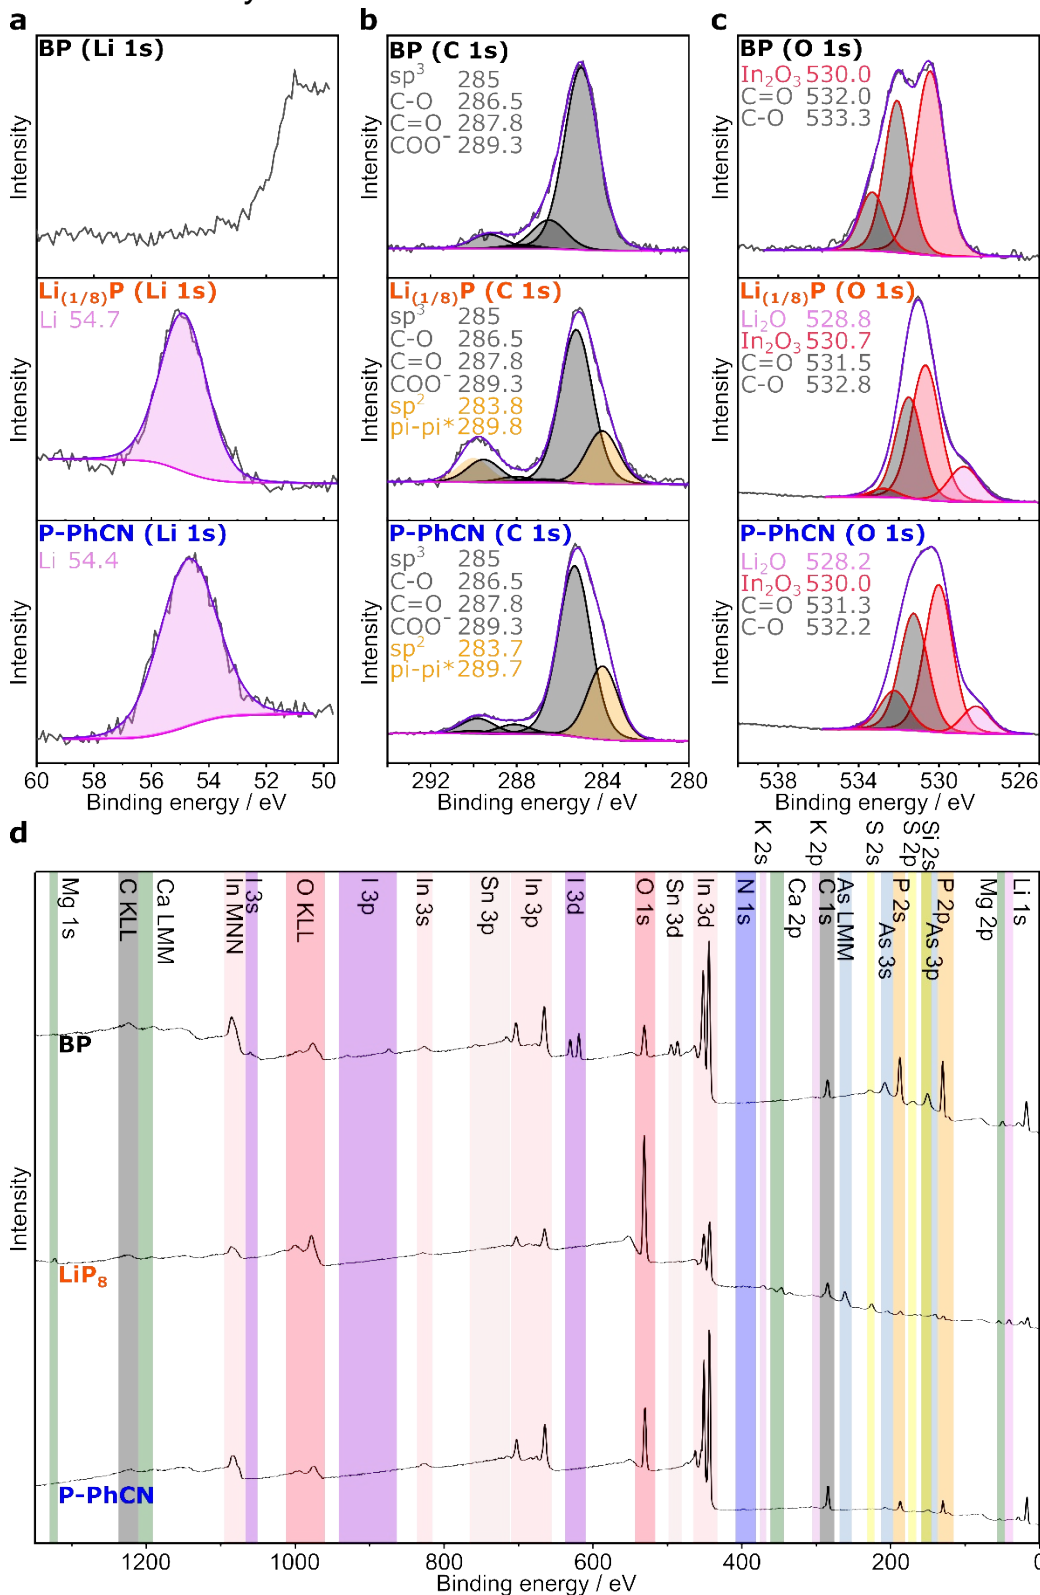

**Supplementary figure S4.** High resolution X-ray photoelectron spectroscopy (XPS) lithium 1s, carbon 1s, and oxygen 1s spectra fitted with several components is shown along with the survey spectrum for each samples BP, Li<sub>(1/8)</sub>P, and P-PhCN.

**Supplementary table S2.** Surface atomic composition extracted from the XPS spectra of BP, Li<sub>(1/8)</sub>P, and P-PhCN.

| <b>BP</b>      |          |                   | <b>Li<sub>(1/8)</sub>P</b> |          |                   |                    |
|----------------|----------|-------------------|----------------------------|----------|-------------------|--------------------|
| <i>Element</i> | <i>%</i> | <i>Ratio vs P</i> | <i>Element</i>             | <i>%</i> | <i>Ratio vs P</i> | <i>Ratio vs Li</i> |
| C              | 26.76    | 0.52              | C                          | 14.43    | 2.60              | 0.40               |
| Li             | 0.00     | 0.00              | Li                         | 35.99    | 6.49              | 1.00               |
| O              | 21.57    | 0.42              | O                          | 44.04    | 7.94              | 1.22               |
| P              | 51.67    | 1.00              | P                          | 5.54     | 1.00              | 0.15               |

| <b>P-PhCN</b>  |          |                   |                    |
|----------------|----------|-------------------|--------------------|
| <i>Element</i> | <i>%</i> | <i>Ratio vs P</i> | <i>Ratio vs Li</i> |
| C              | 28.25    | 2.53              | 1.05               |
| Li             | 26.94    | 2.41              | 1.00               |
| O              | 33.64    | 3.01              | 1.25               |
| P              | 11.17    | 1.00              | 0.41               |

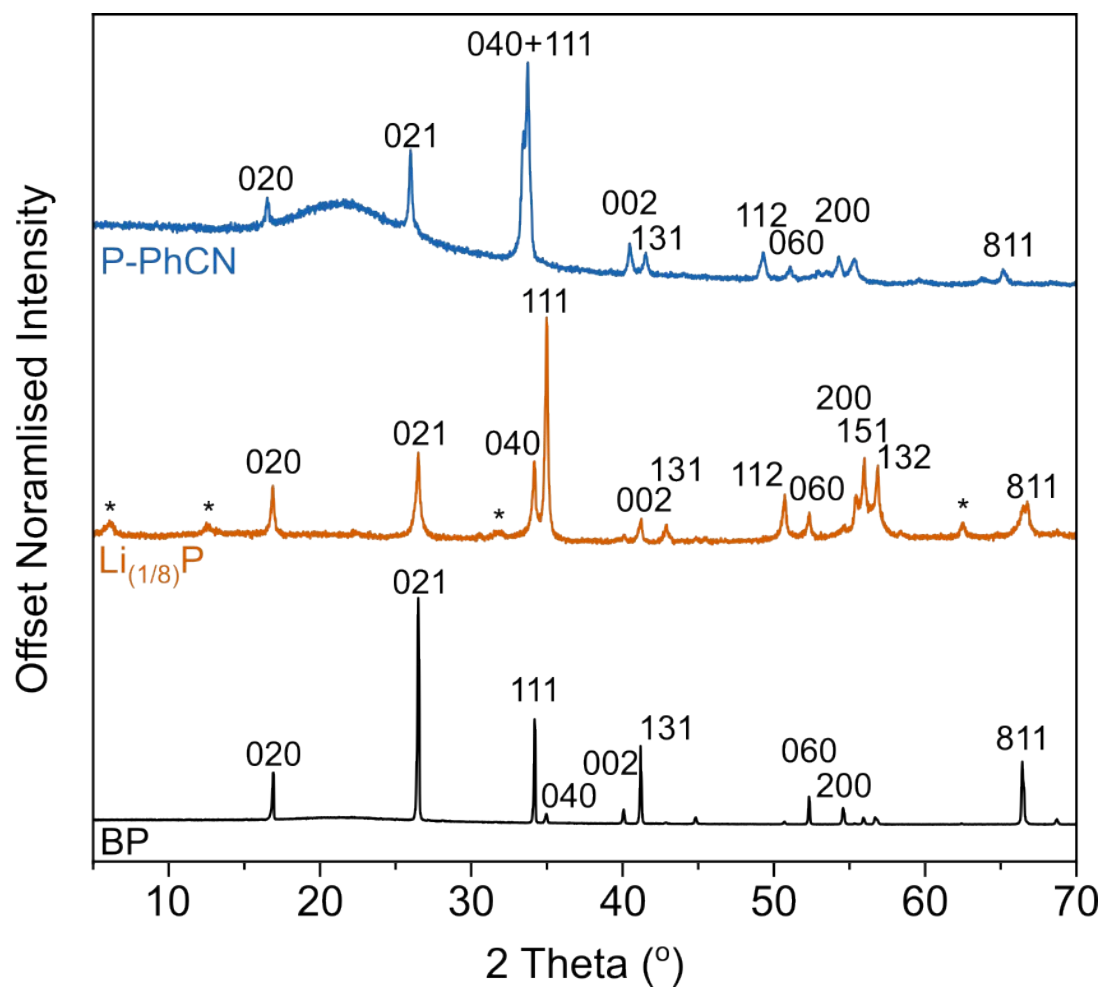

**Supplementary Figure 5.** Powder xray diffraction (Cu  $\kappa\alpha$ ) of, from bottom to top, BP,  $\text{Li}_{(1/8)}\text{P}$ , and P-PhCN

*TEM further analysis*

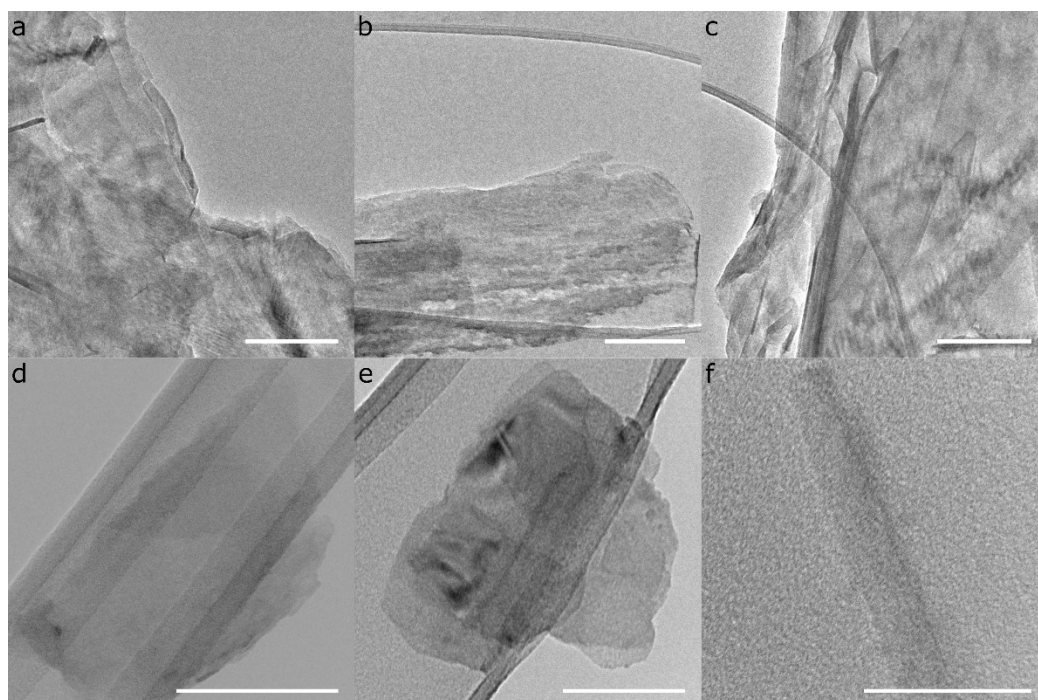

**Supplementary figure S6. Additional TEM micrographs of P-PhCN sonicated in NMP.** Scalebars: (a-c) = 200 nm, (d,e) = 100 nm, (f) = 50 nm.

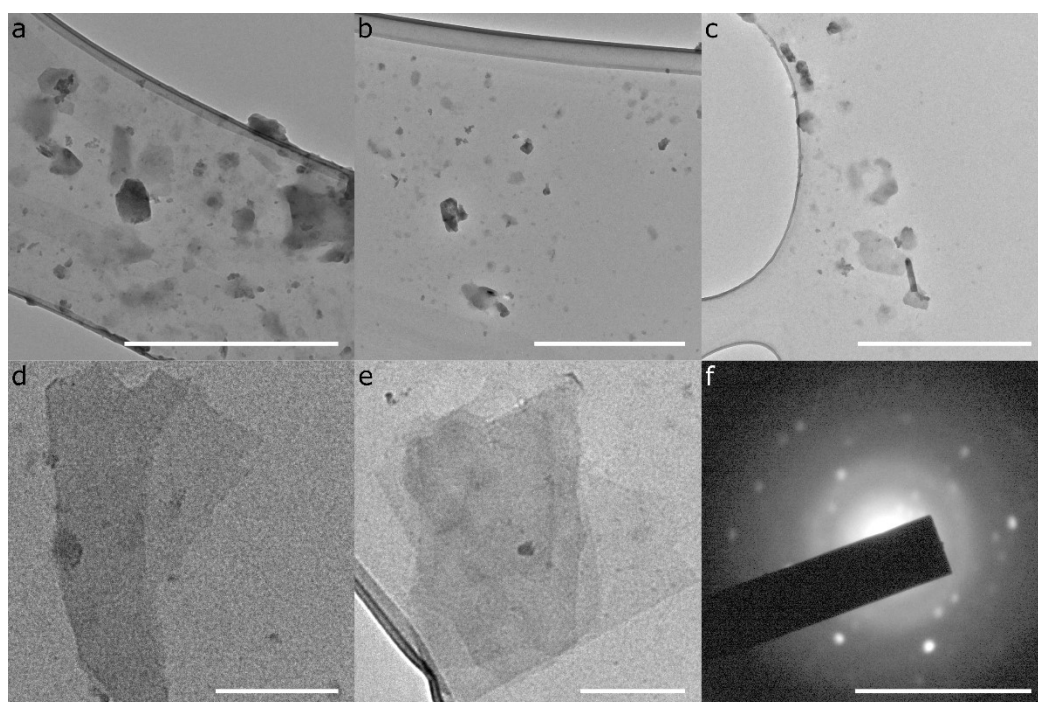

**Supplementary figure S7. TEM characterisation of BP sonicated in NMP.** (a-e) TEM micrographs of exfoliated BP. Scalebars: (a-c) = 1 μm, (d,e) = 200 nm. (f) 20 nm<sup>-1</sup>.



*AFM further analysis*

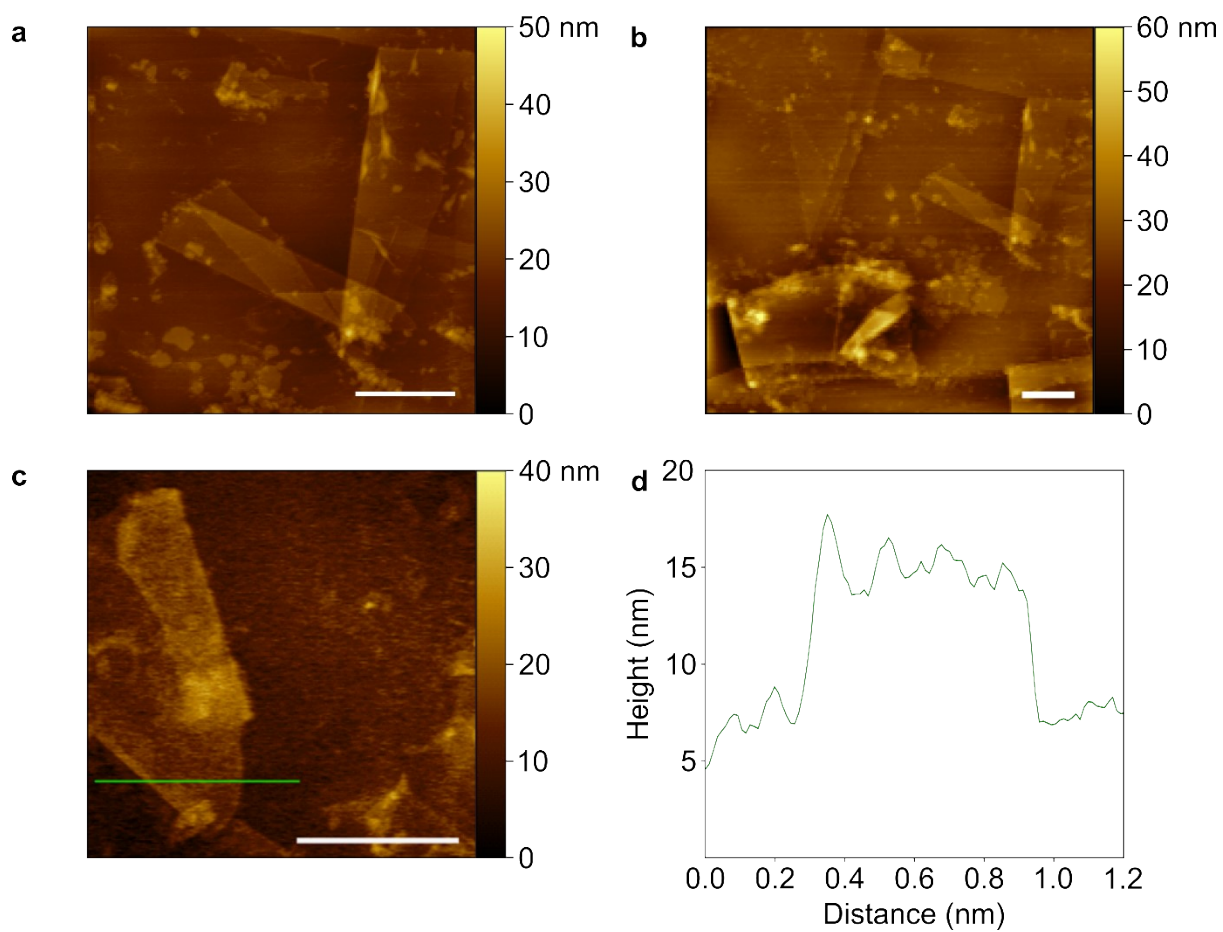

**Supplementary figure S8.** AFM images of tape-exfoliated (a,b) BP and (c)  $\text{Li}_{(1/8)}\text{P}$ . All scalebars = 1  $\mu\text{m}$ . (d) Height line-profile of  $\text{Li}_{(1/8)}\text{P}$  indicated by green line in c.

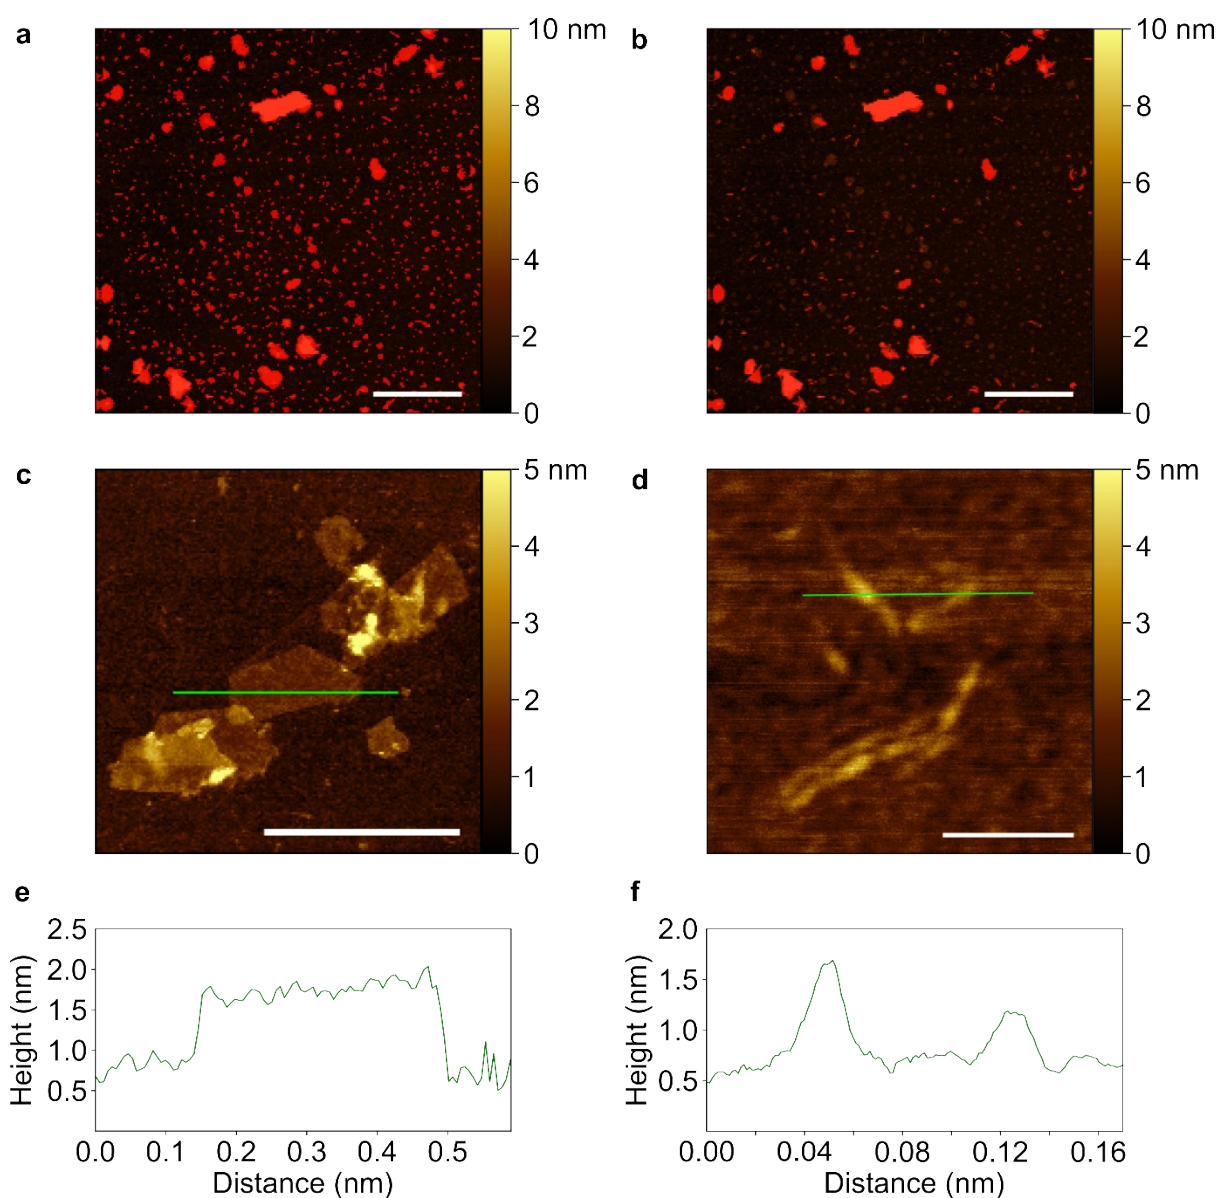

**Supplementary figure S9. Further analysis of AFM characterisation of tape exfoliated P-PhCN.** Data processed AFM image after masking, showing all pixels filtered by a height threshold of (a) 2 nm and (b) 4 nm highlighted in red. (c) AFM image (replot of Main Text Figure 5b) with green line corresponding to height line-profile plotted in (e). (d) AFM image (replot of Main Text Figure 5d) with green line corresponding to height line-profile plotted in (f). Scalebars: (a,b) = 1  $\mu\text{m}$ , (c) = 500 nm, and (d) = 100nm.

## Supplementary computational data.

**Supplementary Table 3. Energy values from DFT calculations.** E refers to output ground state energy from calculation.  $\Delta H_f$  normalised to unit cell (i.e., output energy), P atom (i.e. output divided by 32) and Li atom (divided by number of lithium per unit cell) \* Calculated from  $\text{Li}^+_{(g)}$  calculation by incorporation of lithium's 1<sup>st</sup> ionisation energy (0.1980789 Hartree). ‡ Calculated from  $\text{Li}^0_{(g)}$  value by incorporation of lithium's cohesion energy (0.0738661 Hartree).

|                                                    | E                    |                      | $\Delta H_f$                    |                         |                          |
|----------------------------------------------------|----------------------|----------------------|---------------------------------|-------------------------|--------------------------|
|                                                    | Hartree              | kJ/mol               | kJ mol(unit cell) <sup>-1</sup> | kJ mol(P) <sup>-1</sup> | kJ mol(Li) <sup>-1</sup> |
| <b>bP</b>                                          | $-1.365 \times 10^3$ | $-3.585 \times 10^6$ |                                 |                         |                          |
| <b>P<sub>32</sub></b>                              | $-1.092 \times 10^4$ | $-2.868 \times 10^7$ |                                 |                         |                          |
| <b>Li<sup>+</sup><sub>(g)</sub></b>                | -7.279               | $-1.911 \times 10^4$ | -                               |                         |                          |
| <b>Li<sup>0</sup><sub>(g)</sub> *</b>              | -7.477               | $-1.963 \times 10^4$ | -                               |                         |                          |
| <b>Li<sup>0</sup><sub>(s)</sub> ‡</b>              | -7.551               | $-1.982 \times 10^4$ |                                 |                         |                          |
| <b>Li<sub>1</sub>P<sub>32</sub></b>                | $-1.093 \times 10^4$ | $-2.870 \times 10^7$ | -65.4                           | -2.0                    | -65.4                    |
| <b>Li<sub>2</sub>P<sub>32</sub> (Li different)</b> | $-1.094 \times 10^4$ | $-2.872 \times 10^7$ | -164.5                          | -5.1                    | -82.2                    |
| <b>Li<sub>2</sub>P<sub>32</sub> (Li same)</b>      | $-1.094 \times 10^4$ | $-2.872 \times 10^7$ | -176.4                          | -5.5                    | -88.2                    |
| <b>Li<sub>4</sub>P<sub>32</sub> ("Even")</b>       | $-1.095 \times 10^4$ | $-2.876 \times 10^7$ | -350.4                          | -10.9                   | -87.6                    |
| <b>Li<sub>4</sub>P<sub>32</sub> ("Top")</b>        | $-1.095 \times 10^4$ | $-2.876 \times 10^7$ | -179.0                          | -5.6                    | -44.8                    |
| <b>Li<sub>4</sub>P<sub>32</sub> ("Bottom")</b>     | $-1.095 \times 10^4$ | $-2.876 \times 10^7$ | -380.0                          | -11.9                   | -95.0                    |
| <b>Li<sub>4</sub>P<sub>32</sub> ("Left")</b>       | $-1.095 \times 10^4$ | $-2.876 \times 10^7$ | -294.2                          | -9.2                    | -73.5                    |
| <b>Li<sub>4</sub>P<sub>32</sub> ("Right")</b>      | $-1.095 \times 10^4$ | $-2.876 \times 10^7$ | -326.1                          | -10.2                   | -81.5                    |
| <b>Li<sub>8</sub>P<sub>32</sub></b>                | $-1.098 \times 10^4$ | $-2.884 \times 10^7$ | -849.8                          | -26.6                   | -106.2                   |

### Supplementary Discussion of $\text{Li}_{(1/8)}\text{P}$ Li Configurations

In the  $\text{Li}_2\text{P}_{32}$  (i.e.,  $\text{Li}_{(1/16)}\text{P}$ ) model, there are two primary configurations for Li placement – same layer vs different layer – as discussed in the main text. However, the different initial configurations are possible for all stoichiometries. Using the  $\text{P}_{32}$  ( $2 \times 1 \times 2$ ) initial supercell, there is only one viable initial configuration each for  $\text{LiP}_{32}$  and  $\text{Li}_8\text{P}_{32}$ , however, a large number are possible for  $\text{Li}_4\text{P}_{32}$ . The primary configuration (as discussed in the main text) involved placing two Li in each interlayer gallery to maximise Li distribution (here named "Even"). To better represent the potential diversity in  $\text{Li}_{(1/8)}\text{P}$  structures and model systems with more compact Li distributions, a range of  $\text{Li}_4\text{P}_{32}$  input models were created by removing four Li from the relaxed  $\text{Li}_8\text{P}_{32}$  model.

The  $\text{Li}_8\text{P}_{32}$  system showed breakage of several P bonds and a significant distortion of the P framework (Supplementary figure 15, Main text Fig 2i), meaning removal of different selection of Li would provide a fuller understanding of feasible  $\text{Li}_4\text{P}_{32}$  final structures. In this vein, we conceptually cut halfway down the b/c-axes and removed the lithium either side. Cutting the b-axis gave lithium in the *Top* and *Bottom*, restricted to a single interlayer gallery, similar to the " $\text{Li}_2\text{P}_{32}$  (Li same)" model.

Conversely, cutting down the c-axis gave lithium restricted to the *Left* and *Right* of the cell (Supplementary figure 16).

In the *Top* model, where all 4 lithium remain near the intralayer P-P fractures, the fractures are also seen, while all three other models (*Bottom/Left/Right*) do not show bond cleavage, akin to *Even*. The enthalpy of formation (Supplementary table 3) of *Top* is likewise distinct ( $-5.6 \text{ kJ mol(P)}^{-1}$ ) from the other four  $\text{Li}_4\text{P}_{32}$  models which all very similar in energy ( $-9.2$  to  $-11.9 \text{ kJ mol(P)}^{-1}$ ) independent of local Li configuration. The interlayer structure is similar between all  $\text{Li}_4\text{P}_{32}$  structures, where all models show layer-shear to an AB structure with lithium pockets. Given the stacking similarities, the lesser enthalpy of formation for the *Top* model can be attributed to the necessary energy cost of breaking the intralayer P-P bonds. We note that while P-P bond cleavage is less favourable, the energy cost is low ( $\sim 5.5 \text{ kJ mol}^{-1}$ ). Taken together, the similarities in energy (both for local Li arrangements and with/without P-P cleavage) and in P-framework stacking further support the concept that there will be limited thermodynamic driven local ordering, and intercalation will likely be highly locally heterogeneous.

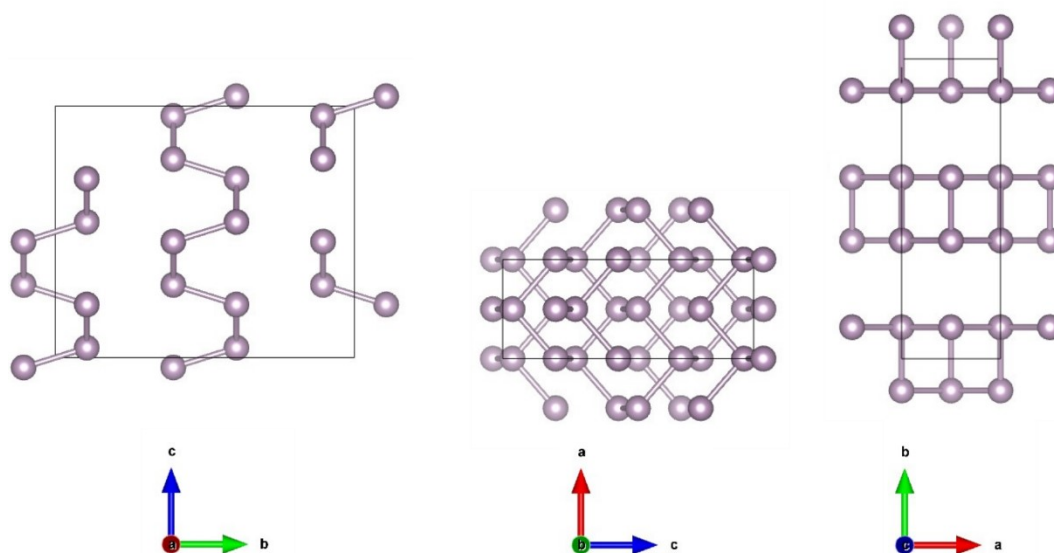

**Supplementary figure S10.** BP supercell down the (from left to right) a, b, and c axes.

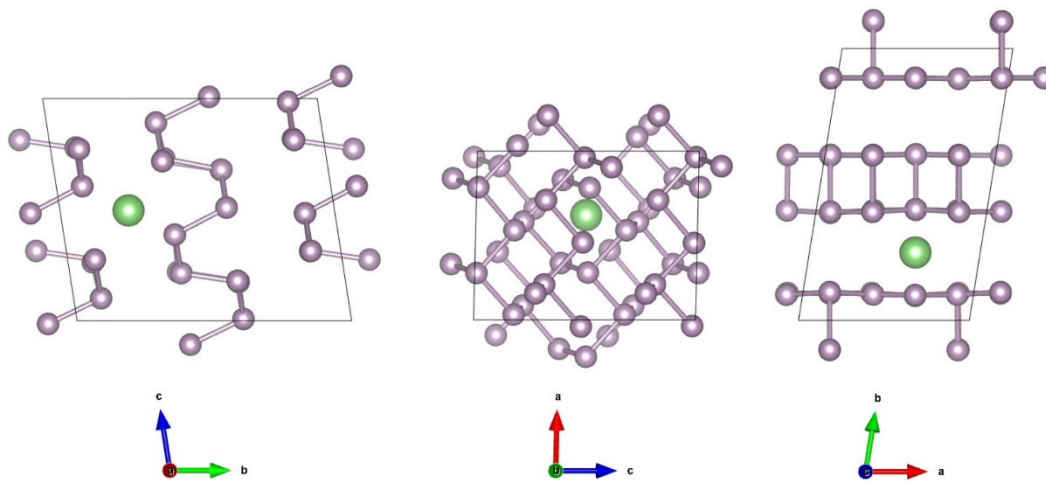

**Supplementary figure S11.**  $\text{LiP}_{32}$  supercell down the (from left to right) a, b, and c axes.

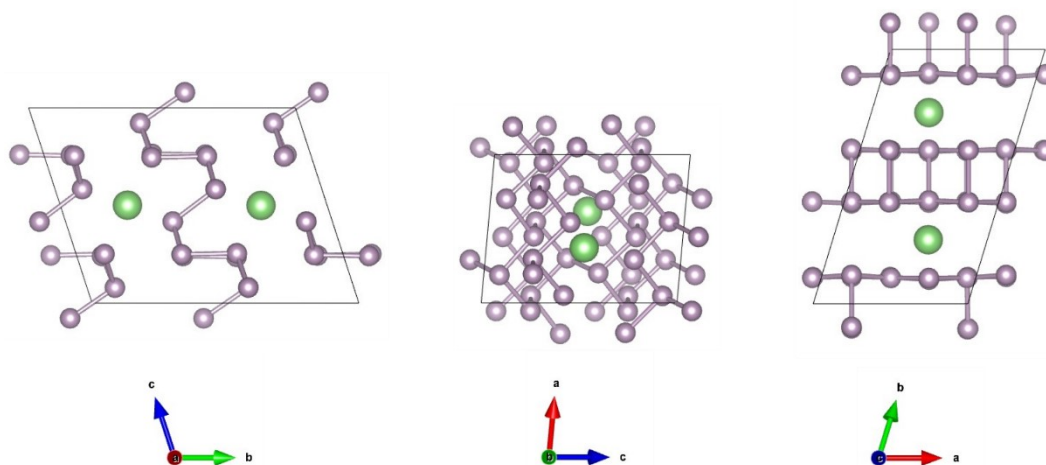

**Supplementary figure S12.**  $\text{Li}_2\text{P}_{32}$  supercell with Li evenly distributed between interlayer galleries, visualised down the (from left to right) a, b, and c axes.

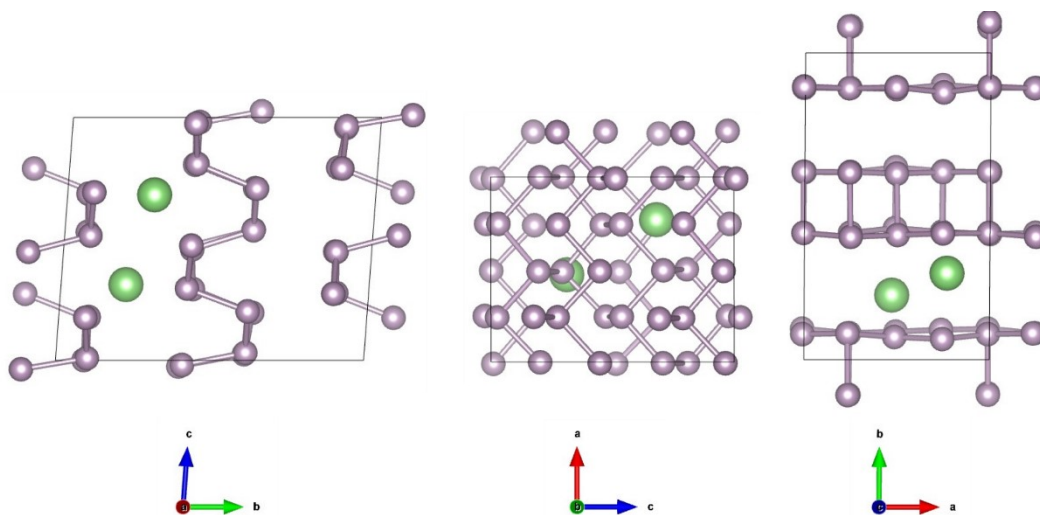

**Supplementary figure S13.**  $\text{Li}_2\text{P}_{32}$  supercell with both Li in the same interlayer gallery, visualised down the (from left to right) a, b, and c axes.

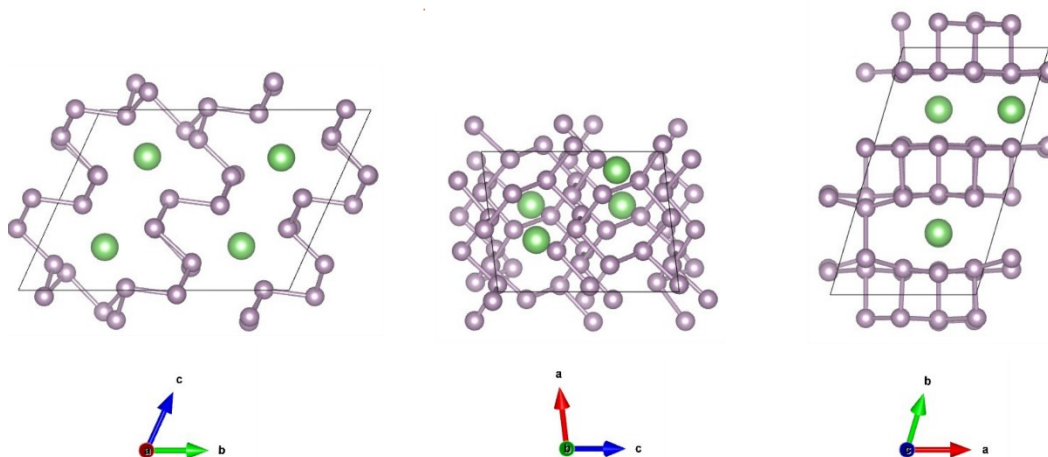

**Supplementary figure S14.**  $\text{Li}_4\text{P}_{32}$  supercell visualised down the (from left to right) a, b, and c axes.

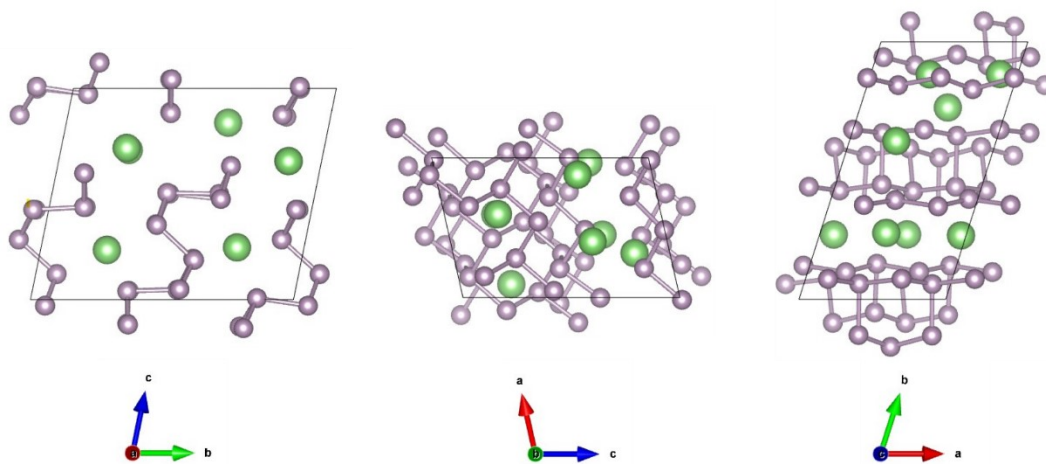

**Supplementary figure S15.**  $\text{Li}_8\text{P}_{32}$  supercell visualised down the (from left to right) a, b, and c axes.

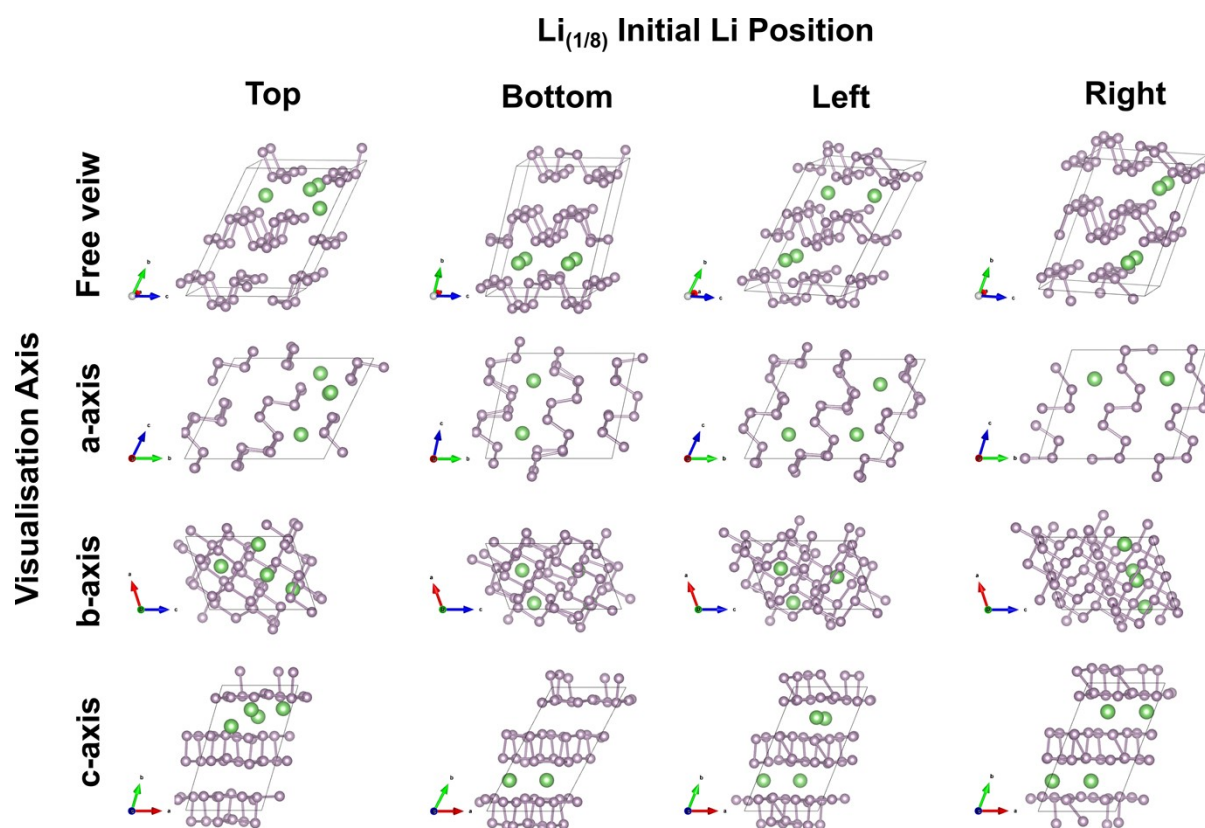

**Supplementary figure S16.** Li<sub>4</sub>P<sub>32</sub> supercells derived from relaxed Li<sub>8</sub>P<sub>32</sub> to remove half of Li in different configurations. Visualised down the (from top to bottom) free view near a axis, a, b, and c axes.



## CRYSTAL17 Input Scripts

### *P-black*

```
CRYSTAL
0 0 04
3.31360 10.47800 4.37630 90.0000
1
15 0.00000 0.10168 0.08056
OPTGEOM
ENDOPT
END
15 10
0 0 7 2.0 1.0
52426.999233 0.0005520716410
7863.2660552 0.0042678595308
1789.5227333 0.0219315291860
506.27300165 0.0856671683730
164.60698546 0.2484068660500
58.391918722 0.4633675397100
21.643663201 0.3535055815600
0 0 3 2.0 1.0
99.013837620 0.0218956799580
30.550439817 0.0956504702950
5.4537087661 -0.2945427018600
0 0 2 2.0 1.0
2.6503362563 1.3294381200000
1.2726688867 0.6610939647300
0 0 1 0.0 1.0
0.3072409700 1.0000000000000
0 0 1 0.0 1.0
0.1202708300 1.0000000000000
0 2 5 6.0 1.0
472.27219248 0.0025710623052
111.58882756 0.0202502979990
35.445936418 0.0915807167870
12.990776875 0.2574945401400
5.0486221658 0.4286289975800
0 2 1 3.0 1.0
1.8889755200 1.0000000000000
0 2 1 0.0 1.0
0.4424064200 1.0000000000000
0 2 1 0.0 1.0
0.1573225300 1.0000000000000
0 3 1 0.0 1.0
0.5061295000 1.0000000000000
99 0
```

```
END
DFT
B3LYP-D3
NUMERICAL
XLGRID
END
GCP
METHOD dft/tzvp
END
TOLINTEG
7 7 7 7 14
SCFDIR
SHRINK
4 4
MAXCYCLE
300
FMIXING
80
TOLDEE
7
END
```

## LiP32

CRYSTAL

0 0 0

1

6.63838802 10.80798997 8.72292705 98.734994 90.090381 80.960448

33

15 -5.066534882611E-01 9.140823091669E-01 8.502776525454E-01

15 -3.283458868683E-01 -1.160466887460E+00 -1.039820289764E-01

15 8.948813466737E-01 4.049593723035E+00 1.827494364588E+00

15 -1.162228037101E-01 -4.428339814653E+00 1.638286759877E+00

15 1.508234452956E+00 -4.097167357267E+00 1.669513679574E-01

15 2.522612374016E+00 4.602278259914E+00 -9.924858268054E-01

15 1.299740299029E+00 -1.427874991024E+00 2.751116883054E+00

15 1.124535310155E+00 8.302600148783E-01 2.369119382041E+00

15 -5.531202596792E-01 1.425179429753E+00 -3.430183692564E+00

15 -3.490003575866E-01 -1.760521488132E+00 4.203020077093E+00

15 8.916375738577E-01 4.685273993958E+00 -2.511568673470E+00

15 -1.197960819970E-01 -3.829781619640E+00 -2.688298645987E+00

15 1.529130562800E+00 -3.497395249845E+00 -4.139963956693E+00

15 2.569199918898E+00 4.090746759608E+00 3.287810877415E+00

15 1.296029731341E+00 -8.299040253375E-01 -1.575269310228E+00

15 1.121091528652E+00 1.466799607781E+00 -1.969832825834E+00

15 2.750132388205E+00 1.176624917003E+00 8.798673279738E-01

15 2.923286755333E+00 -8.983913158959E-01 -7.536479455073E-02

15 -2.421658445231E+00 3.906567532046E+00 1.745390261682E+00

15 3.188820055074E+00 -4.116675202791E+00 1.622004252174E+00

15 -1.743460266037E+00 -4.359163650192E+00 1.382907126540E-01

15 -7.339281696300E-01 4.339035909087E+00 -1.022280514003E+00

15 -2.006640558819E+00 -1.722729736846E+00 2.718779960930E+00

15 -2.175310404453E+00 4.846654177002E-01 2.238277292444E+00

15 2.806918847183E+00 1.703398963187E+00 -3.402902821535E+00

15 2.950686062285E+00 -1.488923808691E+00 4.234726071570E+00

15 -2.425261446615E+00 4.497230943012E+00 -2.439549356928E+00

15 3.186851052982E+00 -3.535167105611E+00 -2.655793639010E+00

15 -1.770695050613E+00 -3.768592071840E+00 -4.171810015465E+00

15 -7.907897761614E-01 3.812570392363E+00 3.260726851012E+00

15 -2.008838091342E+00 -1.141249205087E+00 -1.559105137059E+00

15 -2.178601972941E+00 1.075279493570E+00 -1.946695162714E+00

3 -2.299281050830E+00 1.908572419221E+00 4.221888138057E+00

OPTGEOM

ENDOPT

END

15 10

0 0 7 2.0 1.0

52426.999233 0.0005520716410

|               |                  |
|---------------|------------------|
| 7863.2660552  | 0.0042678595308  |
| 1789.5227333  | 0.0219315291860  |
| 506.27300165  | 0.0856671683730  |
| 164.60698546  | 0.2484068660500  |
| 58.391918722  | 0.4633675397100  |
| 21.643663201  | 0.3535055815600  |
| 0 0 3 2.0 1.0 |                  |
| 99.013837620  | 0.0218956799580  |
| 30.550439817  | 0.0956504702950  |
| 5.4537087661  | -0.2945427018600 |
| 0 0 2 2.0 1.0 |                  |
| 2.6503362563  | 1.3294381200000  |
| 1.2726688867  | 0.6610939647300  |
| 0 0 1 0.0 1.0 |                  |
| 0.3072409700  | 1.0000000000000  |
| 0 0 1 0.0 1.0 |                  |
| 0.1202708300  | 1.0000000000000  |
| 0 2 5 6.0 1.0 |                  |
| 472.27219248  | 0.0025710623052  |
| 111.58882756  | 0.0202502979990  |
| 35.445936418  | 0.0915807167870  |
| 12.990776875  | 0.2574945401400  |
| 5.0486221658  | 0.4286289975800  |
| 0 2 1 3.0 1.0 |                  |
| 1.8889755200  | 1.0000000000000  |
| 0 2 1 0.0 1.0 |                  |
| 0.4424064200  | 1.0000000000000  |
| 0 2 1 0.0 1.0 |                  |
| 0.1573225300  | 1.0000000000000  |
| 0 3 1 0.0 1.0 |                  |
| 0.5061295000  | 1.0000000000000  |
| 3 5           |                  |
| 0 0 6 2.0 1.0 |                  |
| 6269.2628010  | 0.00020540968826 |
| 940.31612431  | 0.00159165540890 |
| 214.22107528  | 0.00828698297070 |
| 60.759840184  | 0.03385637424900 |
| 19.915152032  | 0.11103225876000 |
| 7.3171509797  | 0.27449383329000 |
| 0 0 2 1.0 1.0 |                  |
| 2.9724674216  | 0.23792456411000 |
| 1.2639852314  | 0.30765411924000 |
| 0 0 1 0.0 1.0 |                  |
| 0.5025516200  | 1.0000000000000  |
| 0 0 1 0.0 1.0 |                  |
| 0.1000746200  | 1.0000000000000  |

0 2 1 0.0 1.0  
0.1450713300 1.0000000000000000  
99 0  
END  
DFT  
SPIN  
B3LYP-D3  
NUMERICAL  
XLGRID  
END  
GCP  
METHOD dft/tzvp  
END  
ANDERSON  
TOLINTEG  
7 7 7 8 17  
SCFDIR  
SHRINK  
4 4  
MAXCYCLE  
300  
FMIXING  
90  
TOLDEE  
7  
SPINLOCK  
1 30  
END

**Li2P32 (Same layer)**

CRYSTAL

0 0 0

1

6.61313933 10.98605837 8.69146692 85.754139 90.100148 89.653186

34

15 -9.884418480593E-03 1.011129186927E-01 9.079619762206E-03

15 -6.775969577570E-03 -1.098324504204E-01 -3.653841516840E-02

15 -2.425967879221E-04 4.095432763094E-01 2.958291140049E-01

15 -1.834445481705E-03 -3.883980390474E-01 2.016566307318E-01

15 2.411785508452E-01 -3.898994057021E-01 2.518409181104E-02

15 2.487598419485E-01 4.003334285102E-01 -2.538807965154E-02

15 2.421271064661E-01 -1.143320545984E-01 2.738441911035E-01

15 2.440627871413E-01 8.668411948299E-02 1.755505957948E-01

15 -9.033729545102E-03 8.343074834916E-02 -4.863285518827E-01

15 -6.409368582418E-03 -1.138972728213E-01 4.468362129923E-01

15 -5.827442091986E-03 4.132371612367E-01 -1.910428910643E-01

15 -6.626837228151E-03 -3.873424135446E-01 -2.933842724150E-01

15 2.449805285201E-01 -3.878722655267E-01 -4.625090030364E-01

15 2.455630730213E-01 4.135181703472E-01 4.724514784589E-01

15 2.375226306741E-01 -1.153986670224E-01 -2.104274173888E-01

15 2.338811975668E-01 8.569699422472E-02 -3.084159463983E-01

15 4.937218587670E-01 9.159109138786E-02 1.178673204638E-03

15 4.921294338141E-01 -1.121872585149E-01 -4.323519138425E-02

15 4.874202124188E-01 4.288186929561E-01 2.936063451434E-01

15 4.899532972089E-01 -3.730098696433E-01 1.957737912010E-01

15 -2.536346732254E-01 -3.858626948260E-01 3.109091355134E-02

15 -2.539175231334E-01 4.115843714307E-01 -1.896951770494E-02

15 -2.582792529057E-01 -1.050243596007E-01 2.767770111798E-01

15 -2.613143128535E-01 9.743595164406E-02 1.783051869425E-01

15 4.871917664551E-01 7.411463035821E-02 -4.711741570725E-01

15 4.908786260995E-01 -1.183297241331E-01 4.476834145733E-01

15 -4.986693794883E-01 4.063795544467E-01 -1.945904535037E-01

15 4.955703716536E-01 -3.937190036208E-01 -2.911492711477E-01

15 -2.566324978116E-01 -3.884664348675E-01 -4.647281592926E-01

15 -2.586798857637E-01 4.169245031480E-01 4.567112336017E-01

15 -2.531354453930E-01 -1.288233682686E-01 -2.071409986002E-01

15 -2.545367310607E-01 6.723915844295E-02 -3.137931213584E-01

3 -2.306982028797E-01 2.819773583809E-01 -3.186239955352E-01

3 4.718094296900E-01 2.105771528096E-01 3.119739385477E-01

OPTGEOM

ENDOPT

END

15 10

0 0 7 2.0 1.0

|               |                  |
|---------------|------------------|
| 52426.999233  | 0.0005520716410  |
| 7863.2660552  | 0.0042678595308  |
| 1789.5227333  | 0.0219315291860  |
| 506.27300165  | 0.0856671683730  |
| 164.60698546  | 0.2484068660500  |
| 58.391918722  | 0.4633675397100  |
| 21.643663201  | 0.3535055815600  |
| 0 0 3 2.0 1.0 |                  |
| 99.013837620  | 0.0218956799580  |
| 30.550439817  | 0.0956504702950  |
| 5.4537087661  | -0.2945427018600 |
| 0 0 2 2.0 1.0 |                  |
| 2.6503362563  | 1.3294381200000  |
| 1.2726688867  | 0.6610939647300  |
| 0 0 1 0.0 1.0 |                  |
| 0.3072409700  | 1.0000000000000  |
| 0 0 1 0.0 1.0 |                  |
| 0.1202708300  | 1.0000000000000  |
| 0 2 5 6.0 1.0 |                  |
| 472.27219248  | 0.0025710623052  |
| 111.58882756  | 0.0202502979990  |
| 35.445936418  | 0.0915807167870  |
| 12.990776875  | 0.2574945401400  |
| 5.0486221658  | 0.4286289975800  |
| 0 2 1 3.0 1.0 |                  |
| 1.8889755200  | 1.0000000000000  |
| 0 2 1 0.0 1.0 |                  |
| 0.4424064200  | 1.0000000000000  |
| 0 2 1 0.0 1.0 |                  |
| 0.1573225300  | 1.0000000000000  |
| 0 3 1 0.0 1.0 |                  |
| 0.5061295000  | 1.0000000000000  |
| 3 5           |                  |
| 0 0 6 2.0 1.0 |                  |
| 6269.2628010  | 0.00020540968826 |
| 940.31612431  | 0.00159165540890 |
| 214.22107528  | 0.00828698297070 |
| 60.759840184  | 0.03385637424900 |
| 19.915152032  | 0.11103225876000 |
| 7.3171509797  | 0.27449383329000 |
| 0 0 2 1.0 1.0 |                  |
| 2.9724674216  | 0.23792456411000 |
| 1.2639852314  | 0.30765411924000 |
| 0 0 1 0.0 1.0 |                  |
| 0.5025516200  | 1.0000000000000  |
| 0 0 1 0.0 1.0 |                  |

```
0.1000746200 1.0000000000000000
0 2 1 0.0 1.0
0.1450713300 1.0000000000000000
99 0
END
DFT
B3LYP-D3
NUMERICAL
XLGRID
END
GCP
METHOD dft/tzvp
END
ANDERSON
TOLINTEG
7 7 7 8 17
SCFDIR
SHRINK
4 4
MAXCYCLE
300
FMIXING
90
TOLDEE
7
END
```



***Li2P32 (Different Gallery)***

CRYSTAL

0 0 0

1

6.63407522 10.74268802 8.74805453 96.544248 90.013366 89.863904

34

15 0.9107140000 0.1002230000 0.1013460000

15 0.9639650000 0.8925230000 0.9856660000

15 0.0851670000 0.3954600000 0.2202050000

15 0.0320410000 0.6068280000 0.1799560000

15 0.2776330000 0.6068200000 0.0080820000

15 0.3308580000 0.3991550000 0.8924120000

15 0.2100640000 0.8910180000 0.3142160000

15 0.1573140000 0.0990270000 0.2753270000

15 0.9046510000 0.0944350000 0.6061040000

15 0.9608280000 0.8908290000 0.4838630000

15 0.0843010000 0.4002690000 0.7184010000

15 0.0315440000 0.6083200000 0.6795140000

15 0.2808110000 0.6084860000 0.5098940000

15 0.3369440000 0.4049000000 0.3876340000

15 0.2095520000 0.8924590000 0.8137960000

15 0.1564070000 0.1039190000 0.7735380000

15 0.4029290000 0.1002070000 0.1014080000

15 0.4554030000 0.8924900000 0.9856210000

15 0.5825350000 0.4064650000 0.2144000000

15 0.5310900000 0.6104640000 0.1747520000

15 0.7861850000 0.6068600000 0.0081220000

15 0.8386890000 0.3991010000 0.8923240000

15 0.7106930000 0.8883530000 0.3138210000

15 0.6597000000 0.0903170000 0.2633820000

15 0.4123900000 0.0950660000 0.6058090000

15 0.4594570000 0.8913590000 0.4841390000

15 0.5818930000 0.4090050000 0.7303680000

15 0.5309580000 0.6109620000 0.6799280000

15 0.7821550000 0.6079930000 0.5096020000

15 0.8292130000 0.4042750000 0.3879520000

15 0.7105260000 0.8888500000 0.8189860000

15 0.6591050000 0.0928500000 0.7793460000

3 0.6207180000 0.2496530000 0.4968870000

3 0.3967050000 0.8283320000 0.6313720000

OPTGEOM

ENDOPT

END

15 10

0 0 7 2.0 1.0

|               |                  |
|---------------|------------------|
| 52426.999233  | 0.0005520716410  |
| 7863.2660552  | 0.0042678595308  |
| 1789.5227333  | 0.0219315291860  |
| 506.27300165  | 0.0856671683730  |
| 164.60698546  | 0.2484068660500  |
| 58.391918722  | 0.4633675397100  |
| 21.643663201  | 0.3535055815600  |
| 0 0 3 2.0 1.0 |                  |
| 99.013837620  | 0.0218956799580  |
| 30.550439817  | 0.0956504702950  |
| 5.4537087661  | -0.2945427018600 |
| 0 0 2 2.0 1.0 |                  |
| 2.6503362563  | 1.3294381200000  |
| 1.2726688867  | 0.6610939647300  |
| 0 0 1 0.0 1.0 |                  |
| 0.3072409700  | 1.0000000000000  |
| 0 0 1 0.0 1.0 |                  |
| 0.1202708300  | 1.0000000000000  |
| 0 2 5 6.0 1.0 |                  |
| 472.27219248  | 0.0025710623052  |
| 111.58882756  | 0.0202502979990  |
| 35.445936418  | 0.0915807167870  |
| 12.990776875  | 0.2574945401400  |
| 5.0486221658  | 0.4286289975800  |
| 0 2 1 3.0 1.0 |                  |
| 1.8889755200  | 1.0000000000000  |
| 0 2 1 0.0 1.0 |                  |
| 0.4424064200  | 1.0000000000000  |
| 0 2 1 0.0 1.0 |                  |
| 0.1573225300  | 1.0000000000000  |
| 0 3 1 0.0 1.0 |                  |
| 0.5061295000  | 1.0000000000000  |
| 3 5           |                  |
| 0 0 6 2.0 1.0 |                  |
| 6269.2628010  | 0.00020540968826 |
| 940.31612431  | 0.00159165540890 |
| 214.22107528  | 0.00828698297070 |
| 60.759840184  | 0.03385637424900 |
| 19.915152032  | 0.11103225876000 |
| 7.3171509797  | 0.27449383329000 |
| 0 0 2 1.0 1.0 |                  |
| 2.9724674216  | 0.23792456411000 |
| 1.2639852314  | 0.30765411924000 |
| 0 0 1 0.0 1.0 |                  |
| 0.5025516200  | 1.0000000000000  |
| 0 0 1 0.0 1.0 |                  |

```
0.1000746200 1.0000000000000000
0 2 1 0.0 1.0
0.1450713300 1.0000000000000000
99 0
END
DFT
B3LYP-D3
NUMERICAL
XLGRID
END
GCP
METHOD dft/tzvp
END
ANDERSON
TOLINTEG
7 7 7 8 17
SCFDIR
SHRINK
4 4
MAXCYCLE
300
FMIXING
90
TOLDEE
7
END
```

**Li4P32**

CRYSTAL

0 0 0

1

6.61313933 10.98605837 8.69146692 85.754139 90.100148 89.653186

36

15 0.9062810957 0.0953476965 0.9308727214

15 0.9619925111 0.8903357656 0.9134942864

15 0.0812724286 0.3962114149 0.3863520618

15 0.0292237873 0.6061310753 0.2452544617

15 0.2746964260 0.6078629564 0.0721953943

15 0.3302606724 0.4028927148 0.0546831606

15 0.2074756831 0.8920371036 0.2403957933

15 0.1554972061 0.1019356026 0.0992375600

15 0.9062208745 0.0953867777 0.4308324481

15 0.9620020749 0.8903417432 0.4134541255

15 0.0811450537 0.3961621457 0.8864545189

15 0.0291394995 0.6060723998 0.7452415574

15 0.2746144804 0.6077998624 0.5722067529

15 0.3304132406 0.4028309570 0.5546591876

15 0.2074423498 0.8919803591 0.7404203879

15 0.1553080477 0.1018906724 0.5992921682

15 0.4078825204 0.0949311216 0.9311434855

15 0.4547721965 0.8900980572 0.9129932043

15 0.5769939304 0.4133846333 0.3837932453

15 0.5263816472 0.6144646277 0.2374302714

15 0.7819770196 0.6078719383 0.0727391294

15 0.8287653129 0.4029418757 0.0546704955

15 0.7103421206 0.8836264001 0.2483042913

15 0.6598218684 0.0847028559 0.1018531874

15 0.4077874627 0.0949401245 0.4312413686

15 0.4547210427 0.8900889793 0.4130199532

15 0.5768279210 0.4133971312 0.8837498166

15 0.5263942203 0.6144620759 0.7373404487

15 0.7819417613 0.6079723308 0.5725979372

15 0.8289994019 0.4030596064 0.5545995303

15 0.7103641466 0.8836984187 0.7482876703

15 0.6598059265 0.0847701047 0.6018440608

3 0.6169181680 0.2490829682 0.7427899091

3 0.6169359016 0.2490915034 0.2426484088

3 0.5042667081 0.7465594456 0.2858994165

3 0.7521073196 0.7561124196 0.6094372781

OPTGEOM

ENDOPT

END

15 10  
 0 0 7 2.0 1.0  
 52426.999233 0.0005520716410  
 7863.2660552 0.0042678595308  
 1789.5227333 0.0219315291860  
 506.27300165 0.0856671683730  
 164.60698546 0.2484068660500  
 58.391918722 0.4633675397100  
 21.643663201 0.3535055815600  
 0 0 3 2.0 1.0  
 99.013837620 0.0218956799580  
 30.550439817 0.0956504702950  
 5.4537087661 -0.2945427018600  
 0 0 2 2.0 1.0  
 2.6503362563 1.3294381200000  
 1.2726688867 0.6610939647300  
 0 0 1 0.0 1.0  
 0.3072409700 1.0000000000000  
 0 0 1 0.0 1.0  
 0.1202708300 1.0000000000000  
 0 2 5 6.0 1.0  
 472.27219248 0.0025710623052  
 111.58882756 0.0202502979990  
 35.445936418 0.0915807167870  
 12.990776875 0.2574945401400  
 5.0486221658 0.4286289975800  
 0 2 1 3.0 1.0  
 1.8889755200 1.0000000000000  
 0 2 1 0.0 1.0  
 0.4424064200 1.0000000000000  
 0 2 1 0.0 1.0  
 0.1573225300 1.0000000000000  
 0 3 1 0.0 1.0  
 0.5061295000 1.0000000000000  
 3 5  
 0 0 6 2.0 1.0  
 6269.2628010 0.00020540968826  
 940.31612431 0.00159165540890  
 214.22107528 0.00828698297070  
 60.759840184 0.03385637424900  
 19.915152032 0.11103225876000  
 7.3171509797 0.27449383329000  
 0 0 2 1.0 1.0  
 2.9724674216 0.23792456411000  
 1.2639852314 0.30765411924000  
 0 0 1 0.0 1.0

```
0.5025516200 1.0000000000000000
0 0 1 0.0 1.0
0.1000746200 1.0000000000000000
0 2 1 0.0 1.0
0.1450713300 1.0000000000000000
99 0
END
DFT
B3LYP-D3
NUMERICAL
XLGRID
END
GCP
METHOD dft/tzvp
END
ANDERSON
TOLINTEG
7 7 7 8 17
SCFDIR
SHRINK
4 4
MAXCYCLE
300
FMIXING
90
TOLDEE
7
END
```

**Li8P32**

CRYSTAL

0 0 0

1

6.61313933 10.98605837 8.69146692 85.754139 90.100148 89.653186

40

15 0.9062810957 0.0953476965 0.9308727214

15 0.9619925111 0.8903357656 0.9134942864

15 0.0812724286 0.3962114149 0.3863520618

15 0.0292237873 0.6061310753 0.2452544617

15 0.2746964260 0.6078629564 0.0721953943

15 0.3302606724 0.4028927148 0.0546831606

15 0.2074756831 0.8920371036 0.2403957933

15 0.1554972061 0.1019356026 0.0992375600

15 0.9062208745 0.0953867777 0.4308324481

15 0.9620020749 0.8903417432 0.4134541255

15 0.0811450537 0.3961621457 0.8864545189

15 0.0291394995 0.6060723998 0.7452415574

15 0.2746144804 0.6077998624 0.5722067529

15 0.3304132406 0.4028309570 0.5546591876

15 0.2074423498 0.8919803591 0.7404203879

15 0.1553080477 0.1018906724 0.5992921682

15 0.4078825204 0.0949311216 0.9311434855

15 0.4547721965 0.8900980572 0.9129932043

15 0.5769939304 0.4133846333 0.3837932453

15 0.5263816472 0.6144646277 0.2374302714

15 0.7819770196 0.6078719383 0.0727391294

15 0.8287653129 0.4029418757 0.0546704955

15 0.7103421206 0.8836264001 0.2483042913

15 0.6598218684 0.0847028559 0.1018531874

15 0.4077874627 0.0949401245 0.4312413686

15 0.4547210427 0.8900889793 0.4130199532

15 0.5768279210 0.4133971312 0.8837498166

15 0.5263942203 0.6144620759 0.7373404487

15 0.7819417613 0.6079723308 0.5725979372

15 0.8289994019 0.4030596064 0.5545995303

15 0.7103641466 0.8836984187 0.7482876703

15 0.6598059265 0.0847701047 0.6018440608

3 0.6169181680 0.2490829682 0.7427899091

3 0.6169359016 0.2490915034 0.2426484088

3 0.5042667081 0.7465594456 0.2858994165

3 0.7521073196 0.7561124196 0.6094372781

3 0.4112187034 0.7671334354 0.4686589808

3 0.3580253593 0.7604107427 0.8341333649

3 0.0910754882 0.3014827500 0.4554868998

3 0.3380851782 0.2829103739 0.6074209063

OPTGEOM

ENDOPT

END

15 10

0 0 7 2.0 1.0

|              |                 |
|--------------|-----------------|
| 52426.999233 | 0.0005520716410 |
| 7863.2660552 | 0.0042678595308 |
| 1789.5227333 | 0.0219315291860 |
| 506.27300165 | 0.0856671683730 |
| 164.60698546 | 0.2484068660500 |
| 58.391918722 | 0.4633675397100 |
| 21.643663201 | 0.3535055815600 |

0 0 3 2.0 1.0

|              |                  |
|--------------|------------------|
| 99.013837620 | 0.0218956799580  |
| 30.550439817 | 0.0956504702950  |
| 5.4537087661 | -0.2945427018600 |

0 0 2 2.0 1.0

|              |                 |
|--------------|-----------------|
| 2.6503362563 | 1.3294381200000 |
| 1.2726688867 | 0.6610939647300 |

0 0 1 0.0 1.0

|              |                 |
|--------------|-----------------|
| 0.3072409700 | 1.0000000000000 |
|--------------|-----------------|

0 0 1 0.0 1.0

|              |                 |
|--------------|-----------------|
| 0.1202708300 | 1.0000000000000 |
|--------------|-----------------|

0 2 5 6.0 1.0

|              |                 |
|--------------|-----------------|
| 472.27219248 | 0.0025710623052 |
| 111.58882756 | 0.0202502979990 |
| 35.445936418 | 0.0915807167870 |
| 12.990776875 | 0.2574945401400 |
| 5.0486221658 | 0.4286289975800 |

0 2 1 3.0 1.0

|              |                 |
|--------------|-----------------|
| 1.8889755200 | 1.0000000000000 |
|--------------|-----------------|

0 2 1 0.0 1.0

|              |                 |
|--------------|-----------------|
| 0.4424064200 | 1.0000000000000 |
|--------------|-----------------|

0 2 1 0.0 1.0

|              |                 |
|--------------|-----------------|
| 0.1573225300 | 1.0000000000000 |
|--------------|-----------------|

0 3 1 0.0 1.0

|              |                 |
|--------------|-----------------|
| 0.5061295000 | 1.0000000000000 |
|--------------|-----------------|

3 5

0 0 6 2.0 1.0

|              |                  |
|--------------|------------------|
| 6269.2628010 | 0.00020540968826 |
| 940.31612431 | 0.00159165540890 |
| 214.22107528 | 0.00828698297070 |
| 60.759840184 | 0.03385637424900 |
| 19.915152032 | 0.11103225876000 |
| 7.3171509797 | 0.27449383329000 |



```
0 0 2 1.0 1.0
2.9724674216 0.23792456411000
1.2639852314 0.30765411924000
0 0 1 0.0 1.0
0.5025516200 1.0000000000000000
0 0 1 0.0 1.0
0.1000746200 1.0000000000000000
0 2 1 0.0 1.0
0.1450713300 1.0000000000000000
99 0
END
DFT
B3LYP-D3
NUMERICAL
XLGRID
END
GCP
METHOD dft/tzvp
END
ANDERSON
TOLINTEG
7 7 7 8 17
SCFDIR
SHRINK
4 4
MAXCYCLE
300
FMIXING
90
TOLDEE
7
END
```
